# Supplementary material for: Higher Body Fat but Similar Phase Angle Values in Patients with the Classical Form of Congenital Adrenal Hyperplasia in Comparison to a Control Group
Source: MDPI journal article supplement (doi:10.3390/nu14235184), 2022-12-06
Supplement: s1 [file s1]

**Supplementary table S1. Detailed pharmacological therapy of patients with CAH21OHD**

| Patient | Age | Sex | Phenotype | BMI<br>(kg/m <sup>2</sup> ) | Therapy      | Dose (H/m <sup>2</sup> ) | Andro<br>(ng/mL) |
|---------|-----|-----|-----------|-----------------------------|--------------|--------------------------|------------------|
| 1       | 19  | f   | sw        | 28.78                       | HC + DXM + F | 9.45                     | -                |
| 2       | 19  | f   | sw        | 27.18                       | HC + DXM + F | 9.73                     | 1.36             |
| 3       | 20  | f   | sw        | 21.84                       | HC + DXM + F | 9.20                     | 1.81             |
| 4       | 29  | f   | sw        | 19.41                       | HC + DXM + F | 15.19                    | 1.38             |
| 5       | 27  | f   | sw        | 20.55                       | PRED + F     | 15.36                    | 1.09             |
| 6       | 20  | f   | sw        | 24.09                       | HC + DXM + F | 16.28                    | 1.70             |
| 7       | 22  | f   | sv        | 24.15                       | PRED         | 12.00                    | 1.17             |
| 8       | 19  | f   | sv        | 16.95                       | HC + DXM + F | 12.43                    | 0.43             |
| 9       | 25  | f   | sv        | 33.24                       | HC + DXM     | 7.60                     | 0.12             |
| 10      | 23  | f   | sw        | 22.30                       | HC + F       | 23.58                    | 0.12             |
| 11      | 30  | f   | sv        | 26.88                       | HC + DXM     | 11.08                    | 2.29             |
| 12      | 18  | f   | sv        | 29.34                       | PRED         | 19.78                    | 5.01             |
| 13      | 23  | f   | sw        | 24.93                       | HC + DXM     | 8.59                     | 4.74             |
| 14      | 24  | f   | sv        | 33.94                       | HC + DXM + F | 8.89                     | 4.94             |
| 15      | 24  | f   | sv        | 26.67                       | PRED         | 19.28                    | 3.30             |
| 16      | 29  | m   | sv        | 32.72                       | HC + DXM     | 8.99                     | 0.96             |
| 17      | 28  | m   | sv        | 25.89                       | PRED         | 15.68                    | 0.66             |
| 18      | 18  | m   | sv        | 22.70                       | HC + DXM + F | 10.61                    | 1.98             |
| 19      | 25  | m   | sw        | 18.49                       | HC + DXM + F | 12.72                    | 1.54             |
| 20      | 26  | m   | sv        | 24.17                       | HC + DXM     | 9.71                     | 1.63             |
| 21      | 18  | m   | sw        | 25.08                       | HC + DXM + F | 13.22                    | 2.97             |
| 22      | 23  | m   | sv        | 29.35                       | PRED         | 16.73                    | 8.74             |

HC, hydrocortisone; DXM, dexamethasone; PRED, prednisone; SW, salt wasting; SV, simple virilizing; Andro, androstenedione; F, fludrocortisone

**Supplementary table S2. Characteristics of patients according to vector position on tolerance ellipses based on a healthy reference population**

| Female                                             |         |             |                          |          |      |      |            |           |
|----------------------------------------------------|---------|-------------|--------------------------|----------|------|------|------------|-----------|
|                                                    | Patient | Weight (kg) | BMI (kg/m <sup>2</sup> ) | LST (kg) | %FM  | LSTI | Xc/H (Ω/m) | R/H (Ω/m) |
| Vectors outside 75% to the left of the major axis  | 15      | 60.4        | 26.67                    | 40.1     | 29.3 | 17.7 | 38.5       | 300.3     |
|                                                    | 12      | 61.1        | 29.34                    | 34.4     | 40.3 | 16.5 | 53.4       | 369.4     |
|                                                    | 11      | 67.1        | 26.88                    | 38.4     | 39.3 | 15.4 | 57.0       | 380.4     |
|                                                    | 1       | 68.7        | 28.78                    | 40.1     | 38.7 | 16.8 | 58.3       | 392.9     |
|                                                    | 7       | 63.0        | 24.15                    | 35.4     | 39.7 | 13.4 | 58.9       | 460.7     |
| Vectors outside 75% to the right of the major axis | 4       | 48.1        | 19.41                    | 26.6     | 41.0 | 10.7 | 48.3       | 436.5     |
|                                                    | 5       | 44.1        | 20.55                    | 29.2     | 30.7 | 13.5 | 51.2       | 458.7     |
|                                                    | 3       | 54.8        | 21.84                    | 33.5     | 35.0 | 13.3 | 51.8       | 462.1     |
|                                                    | 8       | 44.2        | 16.95                    | 29.6     | 30.2 | 11.3 | 45.8       | 468.7     |
| Vectors within 75% of tolerance                    | 2       | 62.8        | 27.18                    | 33.7     | 43.3 | 14.6 | 46.7       | 380.3     |
|                                                    | 6       | 52.4        | 24.09                    | 35.3     | 29.0 | 16.2 | 47.5       | 385.1     |
|                                                    | 10      | 50.5        | 22.30                    | 32.7     | 31.3 | 14.4 | 43.2       | 370.8     |
|                                                    | 14      | 91.5        | 33.94                    | 42.5     | 50.1 | 15.8 | 42.6       | 352.6     |
|                                                    | 13      | 69.7        | 24.93                    | 42.1     | 36.0 | 15.1 | 41.3       | 361.2     |
|                                                    | 9       | 73.0        | 33.24                    | 39.2     | 43.9 | 17.8 | 38.5       | 326.6     |
| Male                                               |         |             |                          |          |      |      |            |           |
|                                                    | Patient | Weight (kg) | BMI (kg/m <sup>2</sup> ) | LST (kg) | %FM  | LSTI | Xc/H (Ω/m) | R/H (Ω/m) |
| Vectors outside 75% to the left of the minor axis  | 20      | 65.0        | 24.17                    | 51.4     | 18.5 | 19.0 | 40.1       | 256.5     |
|                                                    | 16      | 74.5        | 32.72                    | 43.7     | 37.9 | 19.2 | 49.7       | 298.2     |
|                                                    | 17      | 77.5        | 25.89                    | 50.8     | 31.0 | 17.0 | 50.8       | 309.5     |
| Vectors outside 75% to the right of the major axis | 19      | 44.7        | 18.49                    | 35.2     | 16.6 | 14.6 | 55.3       | 421.9     |
|                                                    | 18      | 50.4        | 22.70                    | 29.4     | 37.7 | 13.2 | 55.7       | 437.6     |
| Vectors within 75% of tolerance                    | 21      | 69.5        | 25.08                    | 42.2     | 36.0 | 15.2 | 42.6       | 333.9     |
|                                                    | 22      | 75.6        | 29.35                    | 53.0     | 27.9 | 20.6 | 34.9       | 251.1     |

LST, lean soft tissue; FM, fat mass; LSTI, lean soft tissue index; Xc/H, reactance/height; R/H, resistance/height.
